# Supplementary material
Source: PubMed Central journal article supplement (PMC2877250)
Supplement: emm-42-366-s001.pdf [file emm-42-366-s001.pdf]

## Supplemental Data

# Involvement of MITF-A, an alternative isoform of *mi* transcription factor, on the expression of tryptase gene in human mast cells

Sun-Hee Lee<sup>1</sup>, Jeong-Heon Lee<sup>2</sup>, Young-Mi Lee<sup>3</sup> and Dae-Ki Kim<sup>1,4</sup>

## Results

### Expression of MITF-A and tryptase-beta1 in the human mast cells

We examined the mRNA expression of MITF isoforms in the human CD34+ progenitor derived mast cells (hMCs) and HMC-1 cells using the specific primers shown in Supplemental Data Table S1. Total RNAs extracted from hMCs and HMC-1 cells were used to synthesize cDNA by RT-PCR. Both hMCs and HMC-1 cells strongly expressed the transcript of MITF-A. The transcripts of MITF-E and -H were expressed weakly in HMC-1 cells, but not detected in hMCs (Figure 1A). Several tryptase genes are clustered on chromosome 16p13.3. Tryptase-beta is the main trypsin-like serine proteases expressed in mast cells, whereas tryptase-alpha predominate in basophiles (Galli, 2000). We thus examined the expression of tryptase-beta in the human mast cells, HMC-1 cells and the hMCs, by RT-PCR. The transcript of tryptase-beta1 was remarkably expressed in both hMCs and HMC-1 cells, but tryptase-beta2, a alternative splicing isoform, was not detected (Figure 1B). In addition, tryptase beta1 was negative in 293 cells, non-mast cell line. The expression level of tryptase-beta1 mRNA in hMCs was higher than that in HMC-1 cells.

## Methods

### Reverse transcriptase polymerase chain reaction (RT-PCR)

Total RNA was extracted from the cells using Trizol reagent (Invitrogen, Carlsbad, CA). For cDNA synthesis, RNA was reverse-transcribed with the superscript One-Step RT-PCR kit (Invitrogen) for 1 h at 42°C according the manufacturer's instruction. To examine the expression levels of the genes in the human mast cells, PCR was done with the platinum high fidelity Taq DNA polymerase system using a pair of primers as shown in Supplemental Data Table S1. PCR amplification was performed as follows: denaturation (94°C, 30 s), annealing (58°C, 30 s), and extension (72°C, 50 s). The PCR products were electrophoresed on 1.2% agarose gel in 1×TAE buffer and photographed on UV lamp.

**Table S1. List of the specific primers of genes used for PCR amplification.**

| <b>Genes</b>             | <b>Primer Sequence</b>          | <b>Products</b> |
|--------------------------|---------------------------------|-----------------|
| <b><i>5'-Primers</i></b> |                                 |                 |
| MITF-A                   | 5'-TGAAGAGCCCAAACCTATTACGA-3'   | 791 bp          |
| MITF-C                   | 5'-CTTCAGTGGTTTTCCACGAGCT-3'    | 742 bp          |
| MITF-E                   | 5'-AGTAGCAGGGGTTAGTAGGTGGAT-3'  | 744 bp          |
| MITF-H                   | 5'-GGAGGCGCTTAGAGTTCAGATG-3'    | 722 bp          |
| MITF-D                   | 5'-GTTTTAACCTGACAGGCTTTGAATA-3' | 687 bp          |
| MITF-B                   | 5'-CCAAAGTGCAAACGAAGGGTCTCA-3'  | 438 bp          |
| MITF-M                   | 5'-CCTTCTCTTTGCCAGTCCATCTTC-3'  | 555 bp          |
| MITF-J                   | 5'-CTCTCCATGAGTCTGAGCATCTAA-3'  | 647 bp          |
| Tryptase-beta1           | 5'-CCAGGATGCTGAATCTGCTGC-3'     | 840 bp          |
| Tryptase-beta2           | 5'-CCAGGATGCTCCTCCTTGCTC-3'     | 861bp           |
| GAPDH                    | 5'-gaaggtgaaggtcggagt-3'        | 226 bp          |
| <b><i>3'-Primers</i></b> |                                 |                 |
| MITF-com                 | 5'-GATCAATCAAGTTTCCCGAGACAG-3'  |                 |
| Tryptase-beta            | 5'-GCCTACTCACGGCTTTTTGGGGA-3'   |                 |
| GAPDH                    | 5'-gaagatggtgatggatttc-3'       |                 |
